# Supplementary material for: Fractional Laser Releases Tumor-Associated Antigens in Poorly Immunogenic Tumor and Induces Systemic Immunity
Source: PubMed Central journal article supplement (PMC5630620; doi:10.1038/s41598-017-13095-8), 2017-10-06
Supplement: 41598_2017_13095_MOESM1_ESM.pdf [file 41598_2017_13095_MOESM1_ESM.pdf]

1       **Fractional Laser Releases Tumor-Associated Antigens in**  
2               **Poorly Immunogenic Tumor and Induces Systemic**  
3                               **Immunity**

4  
5       **Masayoshi Kawakubo<sup>1,2</sup>\*, Trevor J. Cunningham<sup>1,2</sup>, Shadmehr Demehri<sup>1,2</sup>, Dieter**  
6       **Manstein<sup>1,2</sup>**  
7

8       <sup>1</sup>Cutaneous Biology Research Center, Department of Dermatology, Massachusetts General Hospital  
9       Research Institute, Charlestown, MA 02129, USA

10       <sup>2</sup>Harvard Medical School, Boston, MA

11       \* Correspondence: mkawakubo@mgh.harvard.edu

12  
13  
14       **Conflict of interest statement:** the authors have no conflict of interest.

1 **Supplementary Information**

2 **Supplementary figure**

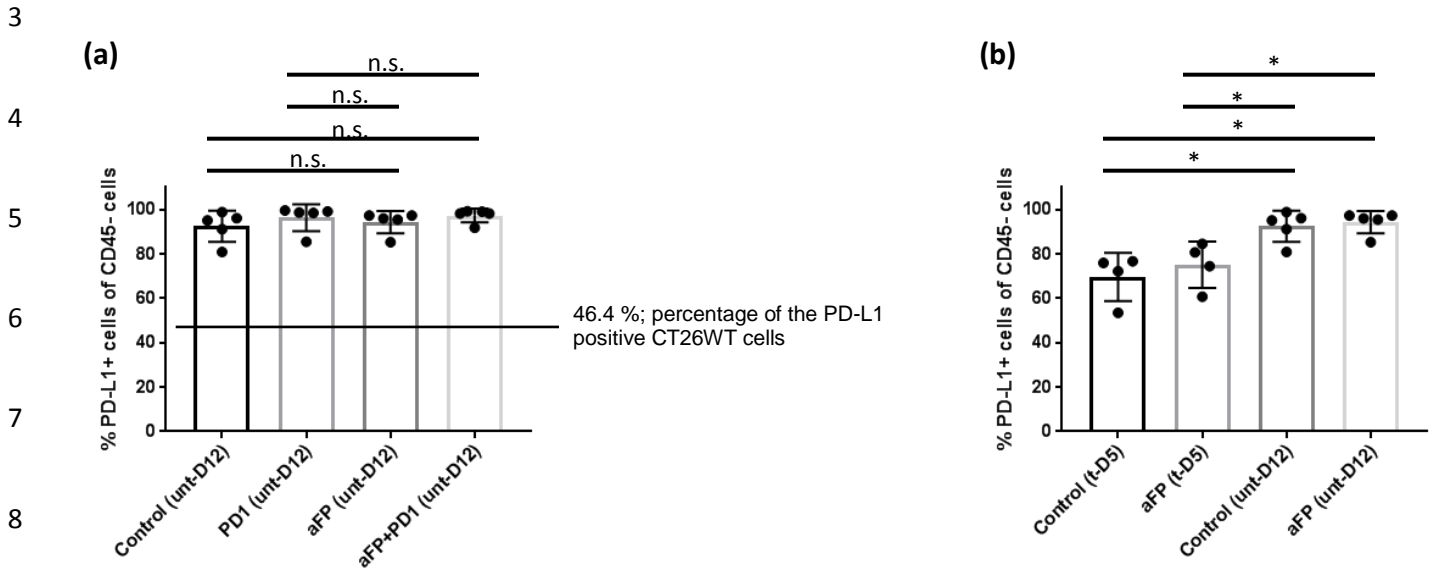

10 **Supplementary figure 1. Flow Cytometric Analysis for PD-L1 Expression of the CT26WT**  
 11 **Tumor in the Two Tumor Mouse Model.**

12 To investigate the up-regulation of PD-L1 on tumor cells which is mediating immune  
 13 suppression to escape immune surveillance, we measured PD-L1 expression on CT26WT tumor  
 14 cell using flow cytometry. (a) % PD-L1+ cells of total CD45- cells in the untreated contralateral  
 15 tumor in the two tumor mouse model on 12 days after aFP treatment. (b) % PD-L1+ cells of total  
 16 CD45- cells in control and aFP group in aFP-treated tumor in the one tumor mouse model 5 days  
 17 after aFP treatment, and in the untreated contralateral tumor in the two tumor mouse model 12  
 18 days after aFP treatment. The bars represent SD. \*  $P < 0.05$

19
